# Supplementary material for: Scalable microfluidic droplet on-demand generator for non-steady operation of droplet-based assays
Source: Royal Society of Chemistry journal article supplement (doi:10.1039/c9lc01103j), 2020-01-01
Supplement: c9lc01103j6.pdf [file c9lc01103j6.pdf]

## Supplementary Information

### Scalable microfluidic droplet on-demand generator for non-steady operation of droplet based assays

Kartik Totlani<sup>a</sup>, Jan-Willem Hurkmans<sup>a</sup>, Walter van Gulik<sup>b</sup>, Michiel Kreutzer<sup>a</sup> and Volkert van Steijn<sup>a\*</sup>

<sup>a</sup> Department of Chemical engineering, Delft University of Technology, van der Maasweg 9, 2629 HZ, Delft, the Netherlands.

<sup>b</sup> Department of Biotechnology, Delft University of Technology, van der Maasweg 9, 2629 HZ, Delft, the Netherlands.

#### Supplementary files:

1. AutoCAD drawing of the devices used in the paper.
2. MATLAB script for running a DoD experiment with MFCS Fluigent pump

#### Supplementary movies:

- S1. Droplet on demand generation for variation of pulse strength reported in Fig. 2a.
- S2. Droplet on demand generation for variation of pulse duration reported in Fig. 2c.
- S3. Droplet on demand generation for partial wetting system reported in Fig. 4c.
- S4. Scale out to 64 parallel DoD generators reported in Fig. 6.

Pressure profiles for the viscosity variation experiments reported in Fig. 4a:

| Glycerol (w/w%) | Viscosity @ 20°C (mPa.s) [1] | Pressure profile                                                                                                                                                                                                                                                                |
|-----------------|------------------------------|---------------------------------------------------------------------------------------------------------------------------------------------------------------------------------------------------------------------------------------------------------------------------------|
| 0               | 1                            | $p_d = 22$ mbar; $p_c = 30$ mbar; $\Delta p_{d,form} = 15$ mbar; $\Delta p_{c,form} = 3$ mbar; $\Delta t_{form} = 0.2$ s; $\Delta t_{pause} = 15$ s; $\Delta p_{d,release} = 5$ mbar; $\Delta p_{c,release} = 12$ mbar; $\Delta t_{release} = 5$ s; $\Delta t_{cycle} = 8$ s.   |
| 50              | 6                            | $p_d = 47$ mbar; $p_c = 37$ mbar; $\Delta p_{d,form} = 35$ mbar; $\Delta p_{c,form} = 2.3$ mbar; $\Delta t_{form} = 0.3$ s; $\Delta t_{pause} = 15$ s; $\Delta p_{d,release} = 5$ mbar; $\Delta p_{c,release} = 12$ mbar; $\Delta t_{release} = 5$ s; $\Delta t_{cycle} = 8$ s. |
| 80              | 60.1                         | $p_d = 39$ mbar; $p_c = 38$ mbar; $\Delta p_{d,form} = 110$ mbar; $\Delta p_{c,form} = 3.7$ mbar; $\Delta t_{form} = 1$ s; $\Delta t_{pause} = 15$ s; $\Delta p_{d,release} = 5$ mbar; $\Delta p_{c,release} = 18$ mbar; $\Delta t_{release} = 10$ s; $\Delta t_{cycle} = 8$ s. |
| 85              | 109                          | $p_d = 54$ mbar; $p_c = 37$ mbar; $\Delta p_{d,form} = 55$ mbar; $\Delta p_{c,form} = 3$ mbar; $\Delta t_{form} = 5$ s; $\Delta t_{pause} = 15$ s; $\Delta p_{d,release} = 5$ mbar; $\Delta p_{c,release} = 18$ mbar; $\Delta t_{release} = 10$ s; $\Delta t_{cycle} = 8$ s.    |
| 90              | 219                          | $p_d = 48$ mbar; $p_c = 37$ mbar; $\Delta p_{d,form} = 60$ mbar; $\Delta p_{c,form} = 1.8$ mbar; $\Delta t_{form} = 10$ s; $\Delta t_{pause} = 10$ s; $\Delta p_{d,release} = 5$ mbar; $\Delta p_{c,release} = 18$ mbar; $\Delta t_{release} = 10$ s; $\Delta t_{cycle} = 8$ s. |

#### References:

[1] Segur, John Bartlett and Oberstar, Helen E, Viscosity of glycerol and its aqueous solutions, Industrial & Engineering Chemistry, 1951, 43, 9, 2117—2120.
